# Supplementary material for: Bifidobacteria exhibit social behavior through carbohydrate resource sharing in the gut
Source: PubMed Central journal article supplement (PMC4623478; doi:10.1038/srep15782), 2015-10-28
Supplement: srep15782-s1.pdf [file srep15782-s1.pdf]

## Supporting Information

# Bifidobacteria exhibit social behavior through carbohydrate resource sharing in the gut

Christian Milani<sup>1</sup>, Gabriele Andrea Lugli<sup>1</sup>, Sabrina Duranti<sup>1</sup>, Francesca Turrone<sup>2</sup>, Leonardo Mancabelli<sup>1</sup>, Chiara Ferrario<sup>1</sup>, Marta Mangifesta<sup>1</sup>, Arancha Hevia<sup>3</sup>, Alice Viappiani<sup>1</sup>, Matthias Scholz<sup>4</sup>, Stefania Arioli<sup>1</sup>, Borja Sanchez<sup>3¶</sup>, Jonathan Lane<sup>5</sup>, Doyle V Ward<sup>6</sup>, Rita Hickey<sup>5</sup>, Diego Mora<sup>7</sup>, Nicola Segata<sup>4</sup>, Abelardo Margolles<sup>3</sup>, Douwe van Sinderen<sup>2</sup> and Marco Ventura<sup>1</sup>

Laboratory of Probiogenomics, Department of Life Sciences, University of Parma, Italy<sup>1</sup>; Alimentary Pharmabiotic Centre and Department of Microbiology, Bioscience Institute, National University of Ireland, Cork, Ireland<sup>2</sup>; Departamento de Microbiología y Bioquímica de Productos Lácteos, IPLA – CSIC, Villaviciosa, Asturias, Spain<sup>3</sup>; Centre for Integrative Biology, University of Trento, Trento, Italy<sup>4</sup>; Teagasc Food Research Centre, Moorepark, Cork, Ireland<sup>5</sup>; Broad Institute, 415 Main St., Cambridge, USA<sup>6</sup>; Department of Food Environmental and Nutritional Sciences, University of Milan, Italy<sup>7</sup>.

<sup>¶</sup>Current address: Department of Analytical Chemistry and Food Science, Faculty of Food Science and Technology. University of Vigo, Spain

Corresponding author. Mailing address for Marco Ventura Department of Life Sciences, University of Parma, Parco Area delle Scienze 11a, 43124 Parma, Italy. Phone: ++39-521-905666. Fax: ++39-521-905604. E-mail: marco.ventura@unipr.it

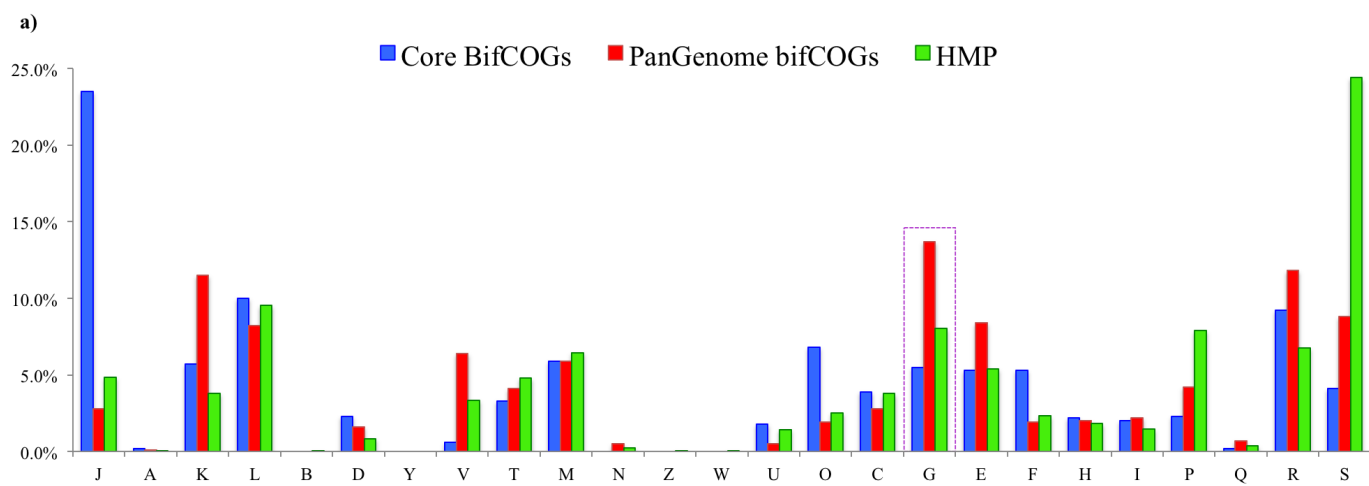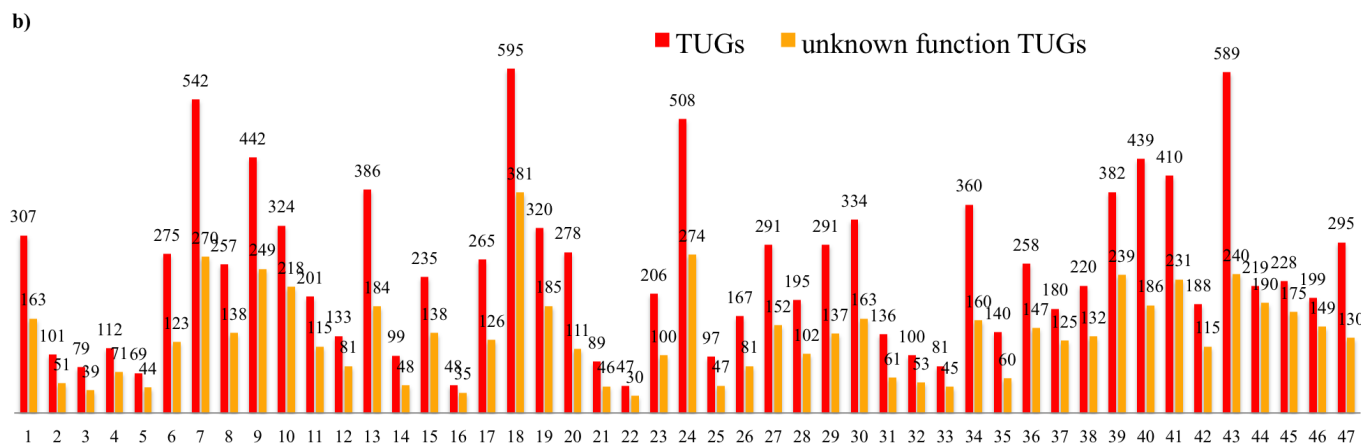

**Fig. S1**



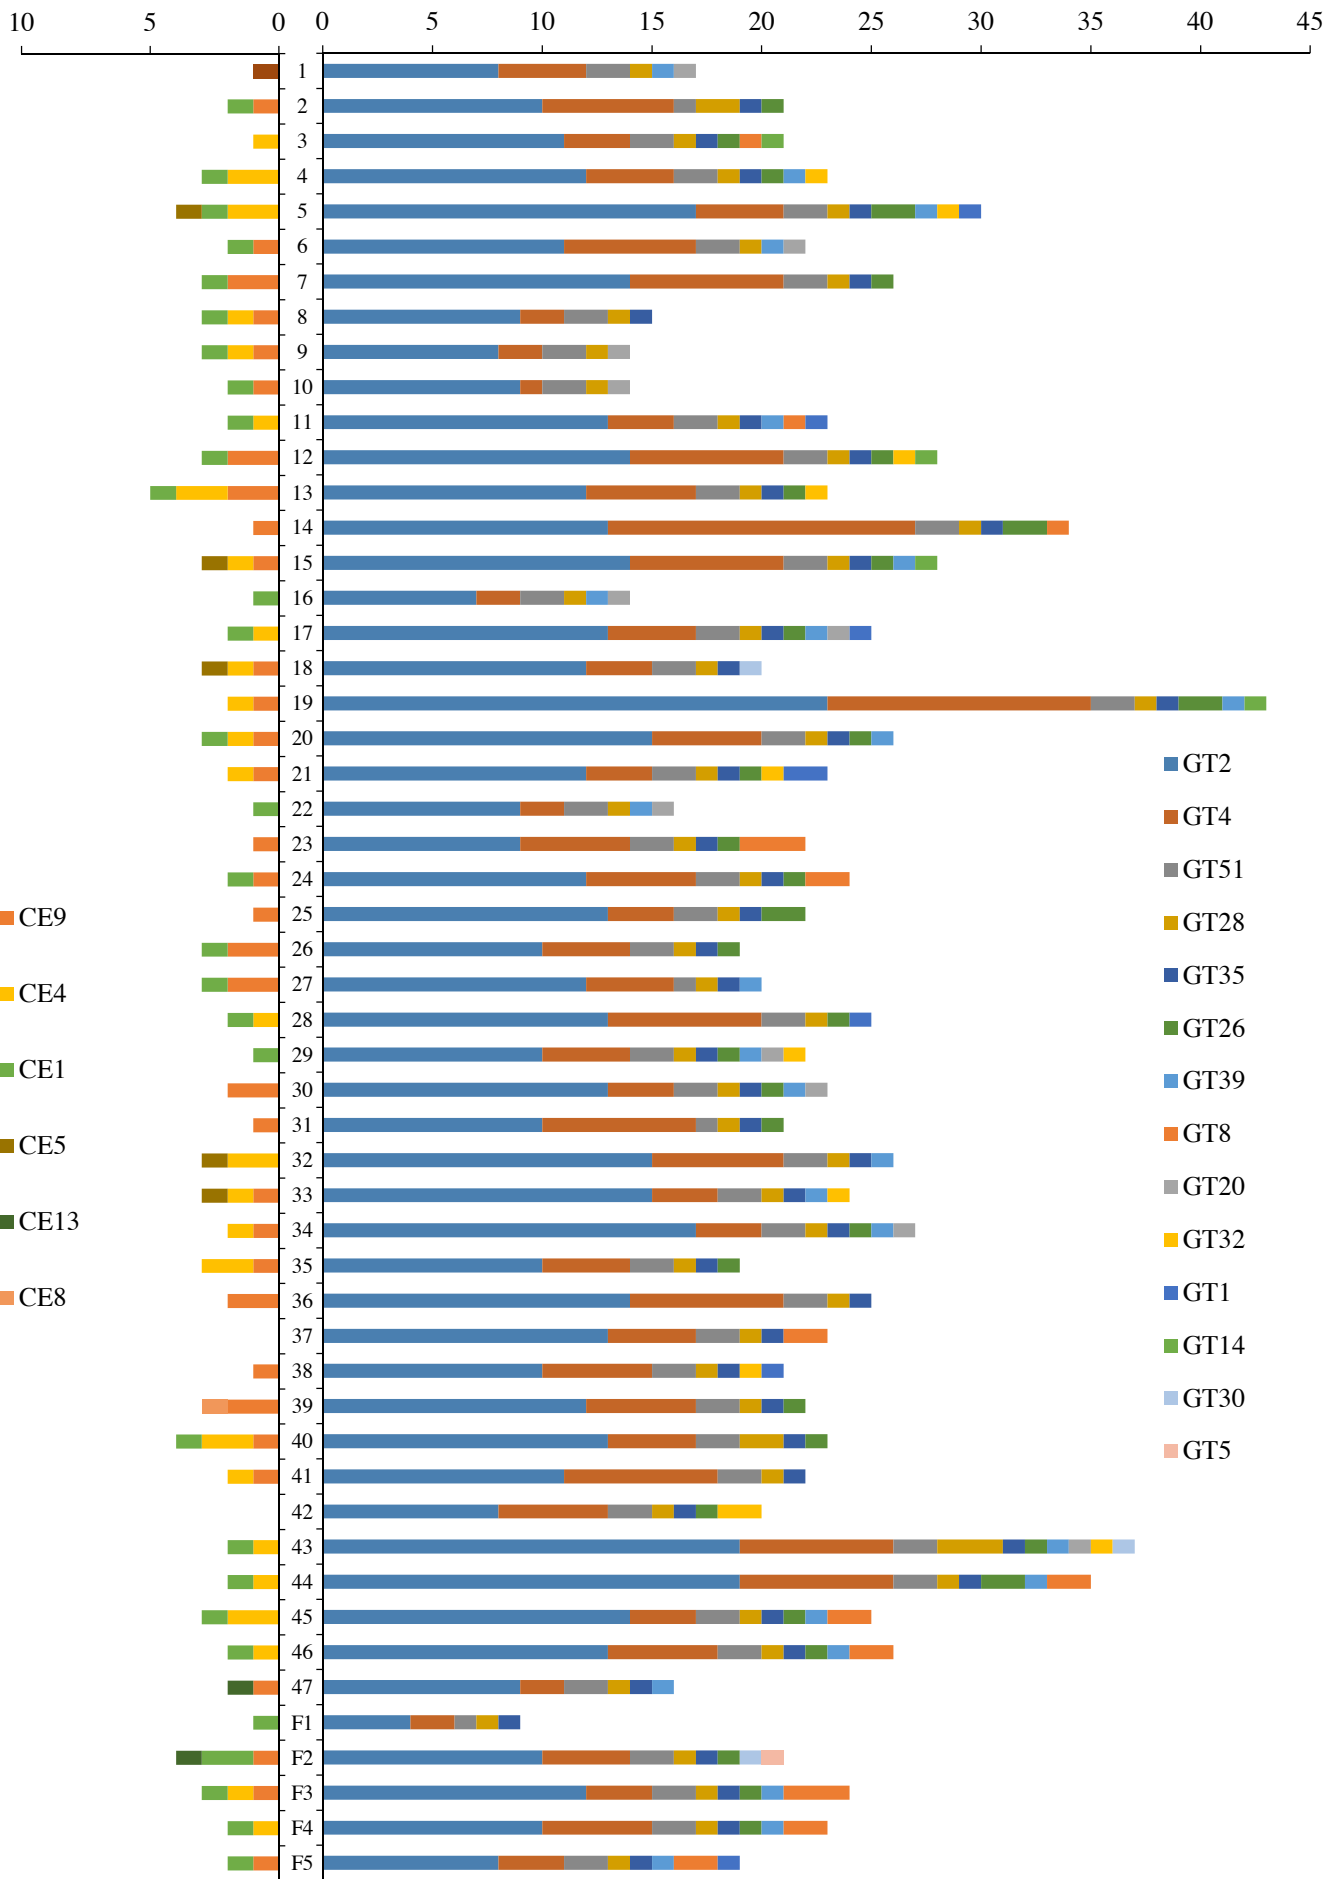

Fig. S3

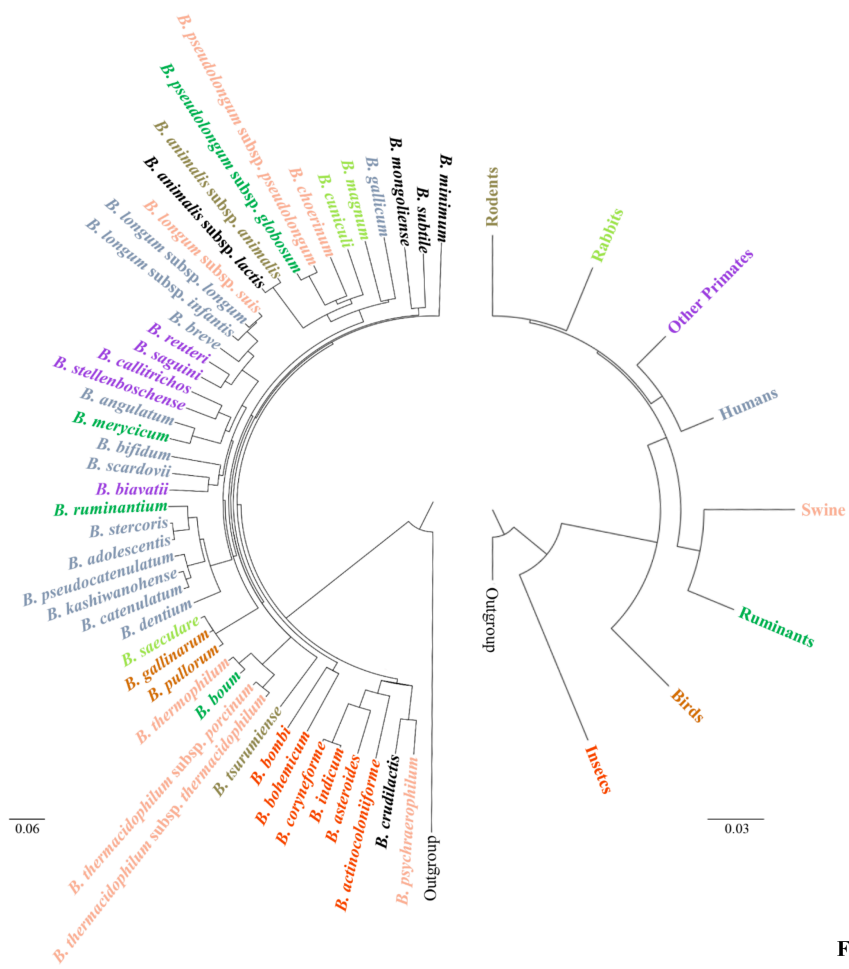

Fig.S4

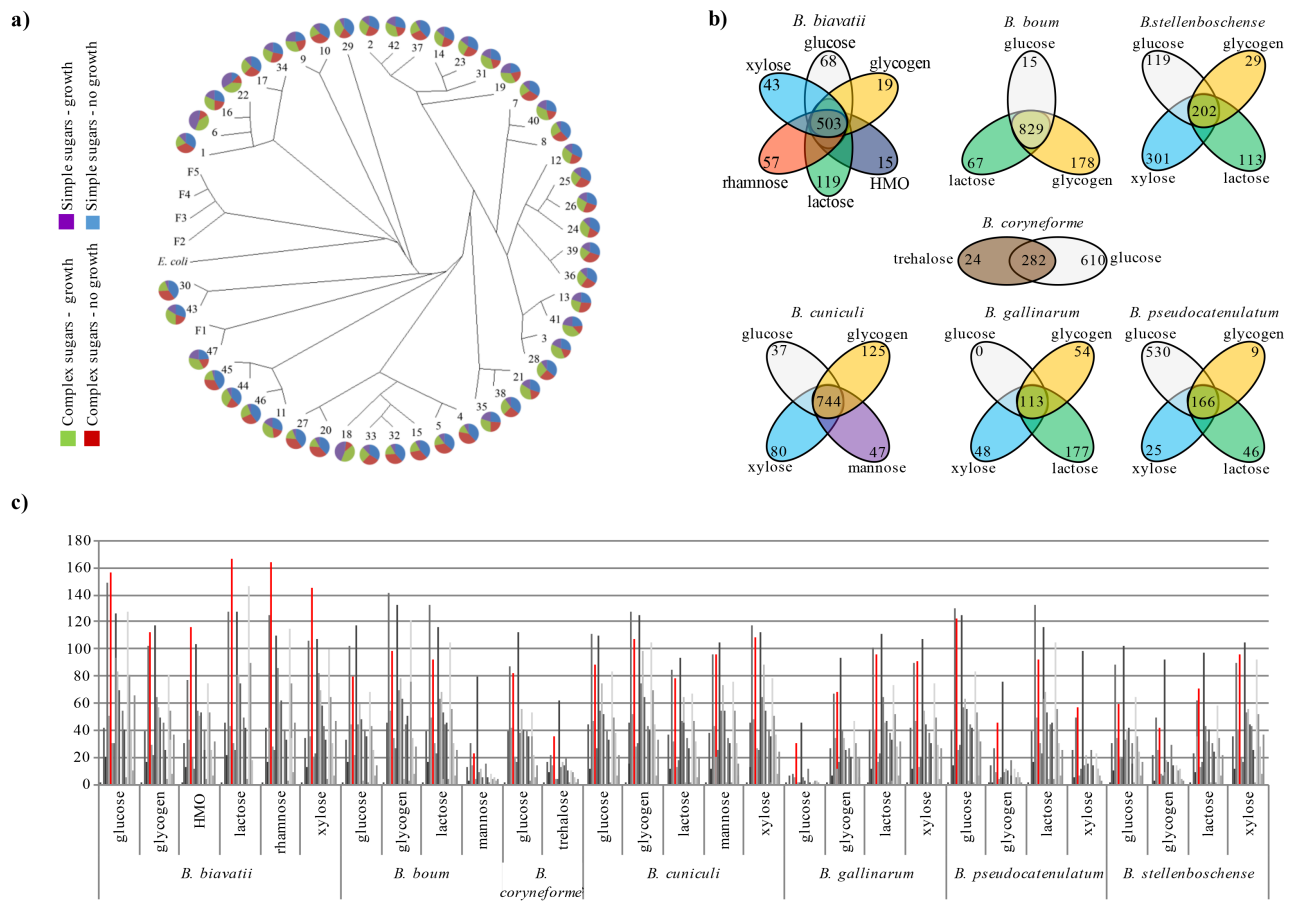

**Fig. S5**

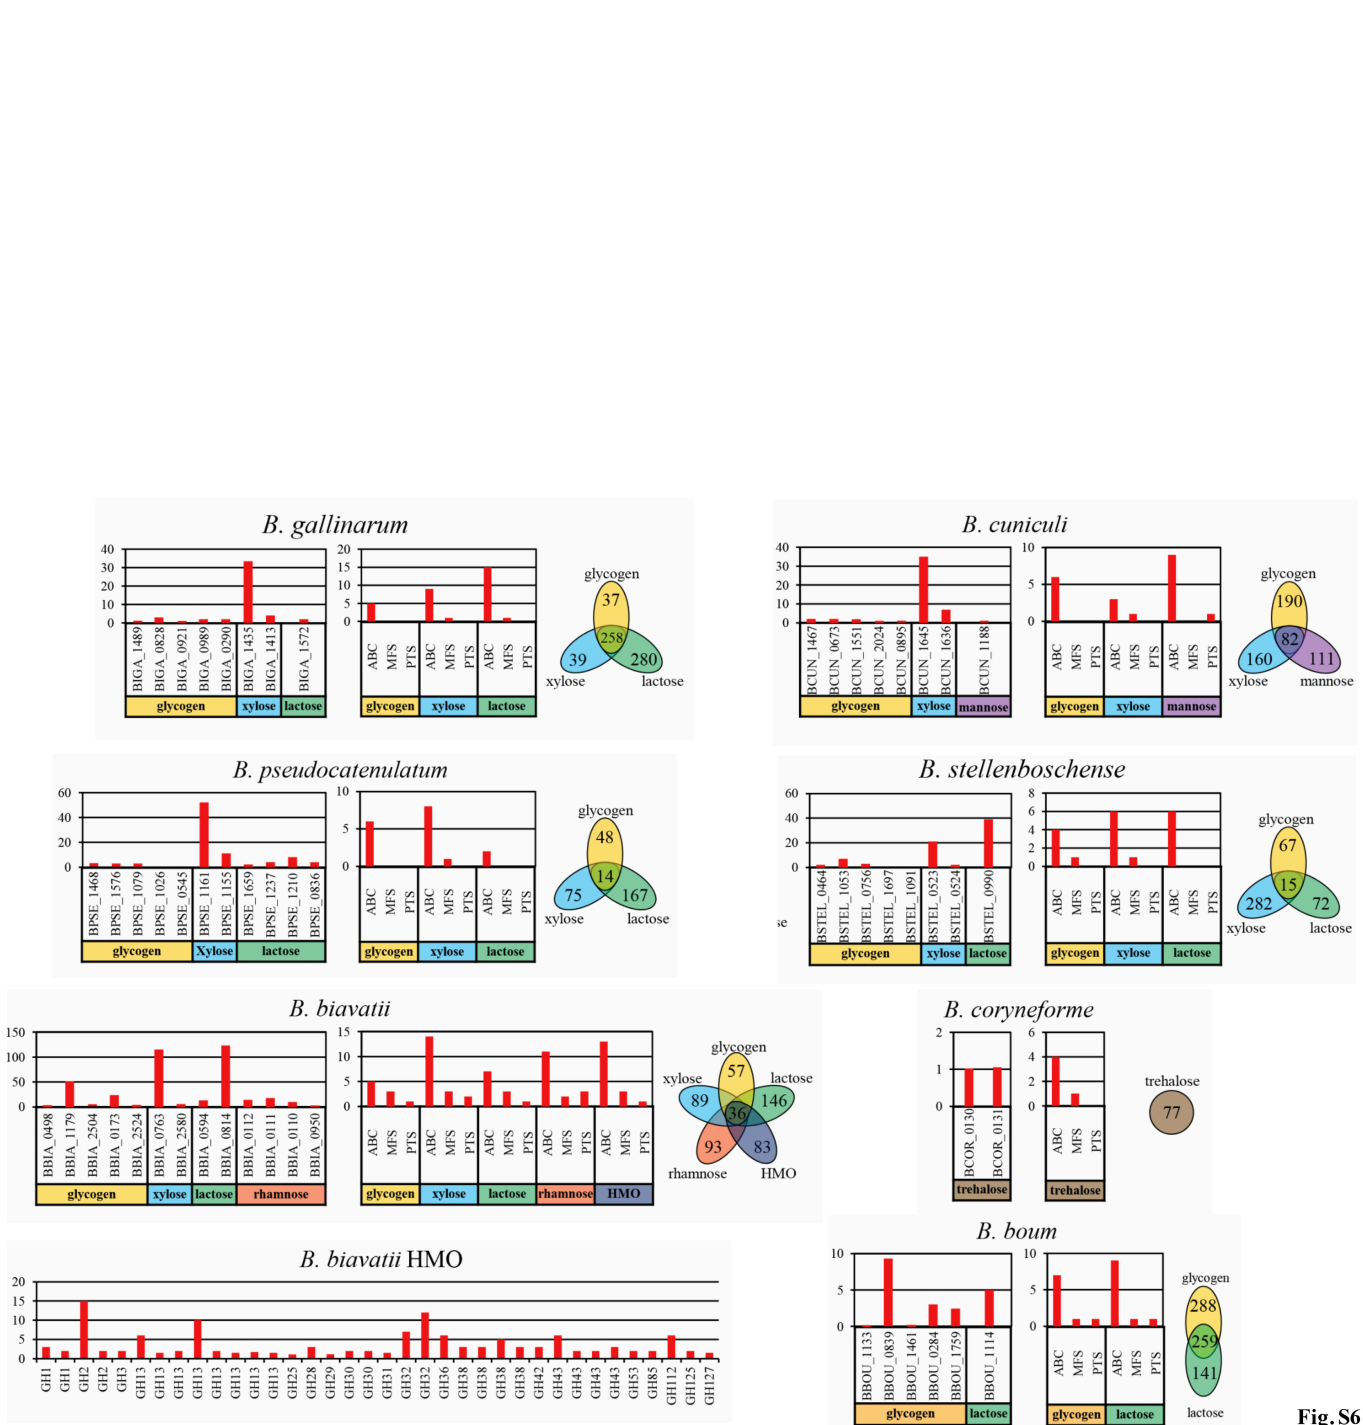

Fig. S6

**Table S1.** General features of the *Bifidobacterium* genomes.

| Number | <i>Bifidobacterium</i> Strains                                      | Genome Status | Genome Size | Isolation                 | Accession Number |
|--------|---------------------------------------------------------------------|---------------|-------------|---------------------------|------------------|
| 1      | <i>B. actinocolonii</i> forme DSM 22766                             | Draft (4)     | 1823388     | Bumblebee digestive tract | JGYK00000000     |
| 2      | <i>B. adolescentis</i> ATCC 15703                                   | Complete      | 2089645     | Intestine of adult        | AP009256.1       |
| 3      | <i>B. angulatum</i> LMG 11039                                       | Draft (6)     | 2003806     | Human faeces              | JGYL00000000     |
| 4      | <i>B. animalis</i> subsp. <i>animalis</i> LMG 10508                 | Draft (13)    | 1915007     | Rat feces                 | JGYM00000000     |
| 5      | <i>B. animalis</i> subsp. <i>lactis</i> DSM 10140                   | Complete      | 1938606     | Fermented milk            | CP001606.1       |
| 6      | <i>B. asteroides</i> LMG 10735 (PRL2011)                            | Complete      | 2167304     | Honeybee hindgut          | CP003325.1       |
| 7      | <i>B. biavatii</i> DSM 23969                                        | Draft (56)    | 3252147     | Feces of tamarin          | JGYN00000000     |
| 8      | <i>B. bifidum</i> LMG 11041                                         | Draft (2)     | 2208468     | Brest-feed Infant faeces  | JGYO00000000     |
| 9      | <i>B. bohemicum</i> DSM 22767                                       | Draft (5)     | 2052470     | Bumblebee digestive tract | JGYP00000000     |
| 10     | <i>B. bombi</i> DSM 19703                                           | Draft (4)     | 1895239     | Bumblebee digestive tract | ATLK00000000     |
| 11     | <i>B. boum</i> LMG 10736                                            | Draft (18)    | 2171356     | Bovine rumen              | JGYQ00000000     |
| 12     | <i>B. breve</i> LMG 13208                                           | Draft (31)    | 2263780     | Infant intestine          | JGYR00000000     |
| 13     | <i>B. callitrichos</i> DSM 23973                                    | Draft (33)    | 2887313     | Feces of common marmoset  | JGYS00000000     |
| 14     | <i>B. catenulatum</i> LMG 11043                                     | Draft (11)    | 2082756     | Adult intestine           | JGYT00000000     |
| 15     | <i>B. choerinum</i> LMG 10510                                       | Draft (20)    | 2096123     | Piglet faeces             | JGYU00000000     |
| 16     | <i>B. coryneforme</i> LMG 18911                                     | Complete      | 1755151     | Honeybee hindgut          | CP007287         |
| 17     | <i>B. crudilactis</i> LMG 23609                                     | Draft (6)     | 2362816     | Raw cow milk              | JHAL00000000     |
| 18     | <i>B. cuniculi</i> LMG 10738                                        | Draft (41)    | 2531592     | Rabbit faeces             | JGYV00000000     |
| 19     | <i>B. dentium</i> LMG 11045 (Bd1)                                   | Complete      | 2636367     | Oral cavity               | CP001750.1       |
| 20     | <i>B. gallicum</i> LMG 11596                                        | Draft (12)    | 2004594     | Adult intestine           | JGYW00000000     |
| 21     | <i>B. gallinarum</i> LMG 11586                                      | Draft (10)    | 2160836     | Chicken caecum            | JGYX00000000     |
| 22     | <i>B. indicum</i> LMG 11587                                         | Complete      | 1734546     | Insect                    | CP006018         |
| 23     | <i>B. kashiwanohense</i> DSM 21854                                  | Draft (30)    | 2307960     | Infant faeces             | JGYY00000000     |
| 24     | <i>B. longum</i> subsp. <i>infantis</i> ATCC 15697                  | Complete      | 2832748     | Intestine of infant       | AP010889.1       |
| 25     | <i>B. longum</i> subsp. <i>longum</i> LMG 13197                     | Draft (8)     | 2384703     | Adult intestine           | JGYZ00000000     |
| 26     | <i>B. longum</i> subsp. <i>suis</i> LMG 21814                       | Draft (36)    | 2335832     | Pig faeces                | JGZA00000000     |
| 27     | <i>B. magnum</i> LMG 11591                                          | Draft (13)    | 1822476     | Rabbit faeces             | JGZB00000000     |
| 28     | <i>B. merycicum</i> LMG 11341                                       | Draft (16)    | 2280236     | Bovine rumen              | JGZC00000000     |
| 29     | <i>B. minimum</i> LMG 11592                                         | Draft (18)    | 1892860     | Sewage                    | JGZD00000000     |
| 30     | <i>B. mongoliense</i> DSM 21395                                     | Draft (43)    | 2170490     | Fermented mare's milk     | JGZE00000000     |
| 31     | <i>B. pseudocatenulatum</i> LMG 10505                               | Draft (10)    | 2283767     | Infant faeces             | JGZF00000000     |
| 32     | <i>B. pseudolongum</i> subsp. <i>globosum</i> LMG 11569             | Draft (26)    | 1935255     | Bovine rumen              | JGZG00000000     |
| 33     | <i>B. pseudolongum</i> subsp. <i>pseudolongum</i> LMG 11571         | Draft (11)    | 1898684     | Swine faeces              | JGZH00000000     |
| 34     | <i>B. psychraerophilum</i> LMG 21775                                | Draft (11)    | 2615078     | Pig caecum                | JGZI00000000     |
| 35     | <i>B. pullorum</i> LMG 21816                                        | Draft (11)    | 2153559     | Chicken faeces            | JGZJ00000000     |
| 36     | <i>B. reuteri</i> DSM 23975                                         | Draft (28)    | 2847572     | Feces of common marmoset  | JGZK00000000     |
| 37     | <i>B. ruminantium</i> LMG 21811                                     | Draft (23)    | 2249807     | Bovine rumen              | JGZL00000000     |
| 38     | <i>B. saeculare</i> LMG 14934                                       | Draft (14)    | 2263283     | Rabbit faeces             | JGZM00000000     |
| 39     | <i>B. saguini</i> DSM 23967                                         | Draft (33)    | 2787036     | Feces of tamarin          | JGZN00000000     |
| 40     | <i>B. scardovii</i> LMG 21589                                       | Draft (34)    | 3141793     | Blood                     | JGZO00000000     |
| 41     | <i>B. stellenboschense</i> DSM 23968                                | Draft (40)    | 2812864     | Feces of tamarin          | JGZP00000000     |
| 42     | <i>B. stercoris</i> DSM 24849                                       | Draft (15)    | 2304613     | Adult faeces              | JGZQ00000000     |
| 43     | <i>B. subtile</i> LMG 11597                                         | Draft (27)    | 2790088     | Sewage                    | JGZR00000000     |
| 44     | <i>B. thermacidophilum</i> subsp. <i>porcinum</i> LMG 21689         | Draft (3)     | 2079368     | Piglet faeces             | JGZS00000000     |
| 45     | <i>B. thermacidophilum</i> subsp. <i>thermacidophilum</i> LMG 21395 | Draft (8)     | 2233072     | Anaerobic digester        | JGZT00000000     |
| 46     | <i>B. thermophilum</i> JCM 1207                                     | Draft (12)    | 2099496     | Swine faeces              | JGZV00000000     |
| 47     | <i>B. tsurumiense</i> JCM 13495                                     | Draft (25)    | 2164426     | Hamster dental plaque     | JGZU00000000     |



**Table S2.** qPCR primers used in this study.

| <b>Primer</b> | <b>Sequence (5'-3')</b> | <b>Targeted ORF/gene</b> | <b>Organism</b>                                              |
|---------------|-------------------------|--------------------------|--------------------------------------------------------------|
| Bbia-fw       | GGATATGTTGTTTCGTATGGGA  | BBIA_0409                | <i>B. biavatii</i> DSM 23969                                 |
| Bbia-rv       | GACTCGCTGTGTATGTGCTTC   |                          |                                                              |
| Bste-fw       | ATACGGCAAGATCGTCAACAT   | BSTEEL_1950              | <i>B. stellenboschense</i> DSM 23968                         |
| Bste-rv       | GATTGACCTTGTTGTAGGCTT   |                          |                                                              |
| Blosu-fw      | ACACCTTCCAATCTACTGCAT   | BLSS_1597                | <i>B. longum</i> subsp. <i>suis</i> LMG 21814                |
| Blosu-rv      | CATCACTGTCTACGAAACCCA   |                          |                                                              |
| Btp-fw        | ACACCACGTATAGTCTCGGC    | BPORC_0092               | <i>B. thermoacidophilum</i> subsp. <i>porcinum</i> LMG 21689 |
| Btp-rv        | GCTTTTGGTTTTCTCCCGGT    |                          |                                                              |
| Bcun-fw       | GTGATGTACCTGGTAGAAGGAA  | BCUN_0008                | <i>B. cuniculi</i> LMG 10738                                 |
| Bcun-rv       | TGTGCCGTATGTGGTGAGATAT  |                          |                                                              |
| Bmag-fw       | CAATGCGAACTATGCGGACA    | BMAGN_1584               | <i>B. magnum</i> LMG 11591                                   |
| Bmag-rv       | AAATCAGCGCGAGTCCATTC    |                          |                                                              |

1 **Supplementary figures.**

2 **Figure S1.** COG functional annotation and Truly Unique Genes (TUG) of the *Bifidobacterium* genus.

3 Panel a shows the COG functional classification of the core BifCOGs in blue, pangenome BifCOGs  
4 in red, and average abundance in samples from the Human Microbiome Project in green. Panel b  
5 displays in red the TUG number in each bifidobacterial genome and in orange the number of TUGs  
6 with unknown function, representing 54.1 % of the total TUG pool. The number of TUG with  
7 predicted or unknown function is reported above each column in the graph. COG functional families  
8 are abbreviated as follow: [J] Translation, ribosomal structure and biogenesis, [A] RNA processing  
9 and modification, [K] Transcription, [L] Replication, recombination and repair, [B] Chromatin  
10 structure and dynamics, [D] Cell cycle control, cell division, chromosome partitioning, [Y] Nuclear  
11 structure, [V] Defense mechanisms, [T] Signal transduction mechanisms, [M] Cell  
12 wall/membrane/envelope biogenesis, [N] Cell motility, [Z] Cytoskeleton, [W] Extracellular  
13 structures, [U] Intracellular trafficking, secretion, and vesicular transport, [O] Posttranslational  
14 modification, protein turnover, chaperones, [C] Energy production and conversion, [G] Carbohydrate  
15 transport and metabolism, [E] Amino acid transport and metabolism, [F] Nucleotide transport and  
16 metabolism, [H] Coenzyme transport and metabolism, [I] Lipid transport and metabolism, [P]  
17 Inorganic ion transport and metabolism, [Q] Secondary metabolites biosynthesis, transport and  
18 catabolism, [R] General function prediction only, [S] Function unknown.

19

20 **Figure S2.** Prediction of the glycosyl hydrolases (GH) and carbohydrate-binding modules (CBM) in  
21 the *Bifidobacterium* genus. Panels a and b show, respectively, the GH and CBM families profile of  
22 all analysed bifidobacterial species, based on the CAZy database. Each bifidobacterial genome  
23 analysed is numbered according to the numbering of the species displayed in Supplementary Table  
24 1.

25

26 **Figure S3.** Prediction of the glycosyl transferases (GT) and carbohydrate esterases (CE) in the  
27 *Bifidobacterium* genus. Left and right bar plots show respectively the CE and GT families profile of  
28 all the bifidobacterial species, based on the CAZy database. Each bifidobacterial genome analysed is  
29 numbered according to the numbering of the species displayed in Supplementary Table 1. Additional  
30 members of the *Bifidobacteriaceae* family (other than those belonging to the genus *Bifidobacterium*)  
31 are as follows: F1 *Gardnerella vaginalis*, F2 *Metascardovia criceti*, F3 *Parascardovia denticolens*,  
32 F4 *Scardovia inopinata* and F5 *Scardovia wiggsiae*.

33

34 **Figure S4.** Comparison between phylogenetic evolution of bifidobacterial species and their  
35 eukaryotic hosts. The tree on the left depicts the evolutionary development of the 47 analyzed  
36 members of the genus *Bifidobacterium*, while the tree on the right illustrates the phylogeny of their  
37 eukaryotic hosts. Colors are used to correlate each bifidobacterial species to their respective host.

38

39 **Figure S5.** Whole-genus carbohydrate utilization survey and glycan transcriptomic analyses of  
40 representative bifidobacterial species from the seven *Bifidobacterium* phylogenetic groups. Panel a  
41 shows a phylogenetic core-supertree of the *Bifidobacteriaceae* family. Each terminal node is a cake  
42 diagram describing the number of simple and complex carbohydrates that each tested bifidobacterial  
43 strain is able to utilize of a total of 23 simple carbohydrates and 27 complex sugars. Each  
44 bifidobacterial genome analysed is numbered according to the numbering of the species displayed in  
45 Supplementary Table 1. Remaining members of the *Bifidobacteriaceae* family are named as follows:  
46 F1 *Gardnerella vaginalis*, F2 *Metascardovia criceti*, F3 *Parascardovia denticolens*, F4 *Scardovia*  
47 *inopinata* and F5 *Scardovia wiggsiae*. Panel b shows a Venn diagram representation of the observed  
48 transcriptome of seven bifidobacterial taxa, chosen as representatives of the seven phylogenetic  
49 groups, grown on a total of eight simple or complex carbohydrates. Panel c consists of a bar plot  
50 representing the COG annotation of the observed transcriptomes. Highlighted in red is the  
51 carbohydrate metabolism and transport (G) COG class.

52

53 **Figure S6.** Expression modulation of genes involved in carbohydrate transport and metabolism  
54 possessed by representative bifidobacterial species from the seven *Bifidobacterium* phylogenetic  
55 groups. Differential expression are reported comparing normalized read counts for the different  
56 conditions versus growth on glucose. Venn diagrams depict the number of differentially transcribed  
57 (>2-fold increased transcription) genes in the different growth conditions as well as actively  
58 transcribed genes shared by all conditions. Bar plots represent fold transcriptional induction of genes  
59 involved in degradation pathways and the number of transporter-encoding genes overexpressed (>2-  
60 fold increased transcription). Glycogen degradation I is constituted by glycogen phosphorylase,  
61 glycogen debranching protein, phosphoglucomutase, amylomaltase, and glucokinase, xylose  
62 degradation I is constituted by xylose isomerase and xylulokinase, lactose degradation is constituted  
63 by  $\beta$ -galactosidases, L-rhamnose degradation II is constituted by L-rhamnofuranose 1-  
64 dehydrogenase, L-rhamnoate dehydratase, 2-keto-3-deoxy-L-rhamnoate aldolase and L-lactaldehyde  
65 dehydrogenase, while trehalose degradation I is constituted by trehalose phosphatase and  $\alpha,\alpha$ -  
66 phosphotrehalase.
